# Supplementary material for: Near infra-red emission from a mer-Ru(ii) complex: consequences of strong σ-donation from a neutral, flexible ligand with dual binding modes
Source: Royal Society of Chemistry journal article supplement (doi:10.1039/c3cc49880h), 2014-01-01
Supplement: c3cc49880h1.pdf [file c3cc49880h1.pdf]

## **Near Infra-Red emission from a *mer*-Ru(II) complex: consequences of strong $\sigma$ -donation from a neutral, flexible ligand with dual binding modes**

**Amlan K. Pal,<sup>a</sup> Nelsi Zaccheroni,<sup>\*,b</sup> Sebastiano Campagna<sup>\*,c</sup> and Garry S. Hanan<sup>\*,a</sup>**

*<sup>a</sup>Département de Chimie, Université de Montréal, 2900 Edouard-Montpetit, Montréal, Québec H3T-1J4, Canada.*

*Dipartimento di Chimica « G. Ciamician », Università di Bologna, 40126 Bologna, Italia.*

*Dipartimento di Scienze Chimiche, Università di Messina, 98166 Messina, Italia.*

## **Electronic Supporting Information**

## • **Materials, methods and instrumentation**

Nuclear magnetic resonance (NMR) spectra were recorded in CD<sub>3</sub>CN at room temperature (r.t.) on a Bruker AV400 (400 MHz) and AV700 (700 MHz) spectrometers (as noted in the experimental) for <sup>1</sup>H NMR and at 100 and 175 MHz (as noted in the experimental) for <sup>13</sup>C NMR, respectively. Chemical shifts are reported in part per million (ppm) relative to residual solvent protons (1.94 ppm for CD<sub>3</sub>CN, 7.26 ppm for CDCl<sub>3</sub>) and the carbon resonance (118.69 ppm for CD<sub>3</sub>CN, 77.00 ppm for CDCl<sub>3</sub>) of the solvent.

Absorption spectra were measured in deaerated acetonitrile at r.t. on a Cary 500i UV-Vis-NIR Spectrophotometer. Corrected fluorescence emission spectra (450 W Xe lamp) in the IR range were obtained with a modular UV-VIS-NIR spectrofluorimeter Edinburgh Instrument, equipped with an Edinburgh Instruments Ge detector (for the 800–1600 nm spectral range). Corrections for instrumental response, inner filter effects and phototube sensitivity were performed. The luminescence quantum yield of **1** was calculated<sup>1</sup> by optical dilution method recording the emission spectra of the degassed solution in acetonitrile and of a solution of cyanine IR-125 in dimethylsulfoxide ( $\Phi = 0.23$ )<sup>2</sup> as the reference. Luminescence lifetimes were determined by time-correlated single-photon-counting (TCSPC) with an Edinburgh EPL-405 spectrometer (light pulse: picosecond pulse diode laser, pulse width 500 ps at 405 nm). Electrochemical measurements were carried out in argon-purged purified acetonitrile at room temperature with a BAS CV50W multipurpose equipment. The working electrode was a glassy carbon electrode. The counter electrode was a Pt wire, and the pseudo-reference electrode was a silver wire. The reference was set using an internal 1 mM ferrocene/ferrocinium sample at 395 mV vs. SCE in acetonitrile. The concentration of the compounds was about 1 mM.

Tetrabutylammonium hexafluorophosphate (TBAP) was used as supporting electrolyte and its concentration was 0.10 M. Cyclic voltammograms of **L1**, **1** and **2** were obtained at scan rates of 100, 50 and 25 mV s<sup>-1</sup>, respectively. The criteria for reversibility were the separation of 60 mV between cathodic and anodic peaks, the close to unity ratio of the intensities of the cathodic and anodic currents, and the constancy of the peak potential on changing scan rate. Differential pulse voltammetry was conducted with a sweep rate of 20 mV s<sup>-1</sup> and a pulse amplitude, width and period of 50 mV, 50 ms and 200 ms, respectively.

Experimental uncertainties are as follows: absorption maxima, ±2 nm; molar absorption coefficient, 10%; redox potentials, ± 10 mV; emission maxima, ±4 nm; emission lifetimes, 10%; emission quantum yield, 20%.

1,3,4,6,7,8-Hexahydro-2H-pyrimido[1,2- $\alpha$ ]pyrimidine (**H-hpp**), 2,6-dibromopyridine, ( $\pm$ ) BINAP, *t*-BuOK were purchased from Aldrich and used as received. Cyanine IR-125 was purchased from Acros Organics. Ph-tpy<sup>3</sup> (Ph-tpy = 4'-phenyl-2,2':6',2''-terpyridine), Ru(DMSO)<sub>4</sub>Cl<sub>2</sub>,<sup>4</sup> RuCl<sub>3</sub>(*i*PrSPh)<sub>2</sub>(CH<sub>3</sub>OH)<sup>5</sup> were synthesized using literature procedures.

## • Synthetic Details

### Synthesis of **L1**:

( $\pm$ ) BINAP (0.06 mmol, 38 mg) was placed in an oven dried round bottomed flask purged with nitrogen which was sealed with a septum. Dry toluene (3 mL) was added via syringe. The resulting suspension was heated at 90 °C for 2 min to dissolve the BINAP. This was cooled to room temperature and Pd(OAc)<sub>2</sub> (0.04 mmol, 9 mg) was added and stirred for 3 min. To the resulting bright yellow solution, 2,6-dibromopyridine (2 mmol, 474 mg) and 1,3,4,6,7,8-

hexahydro-2*H*-pyrimido[1,2-*a*]pyrimidine (4.3 mmol, 600 mg) were added. Stirring for 5 min at ambient temperature resulted in a pale orange slurry to which was added *t*-BuOK (5.6 mmol, 640 mg). The reaction mixture was then stirred at 90 °C for 3.5 h, was cooled to room temperature and diethyl ether (60 mL) was added and the mixture was filtered. Evaporation of the filtrate afforded the ligand (**L1**) as crystalline pale yellow solid. Single crystals suitable for X-ray crystallography were grown by slow evaporation of a diethyl ether solution of the compound. Yield = 563 mg (80 %). <sup>1</sup>H NMR (CDCl<sub>3</sub>, 400 MHz); 7.34 (t, *J*<sup>t</sup> = 8 Hz, 2 H), 7.11 (d, *J*<sup>d</sup> = 8 Hz, 2 H), 3.83 (t, *J*<sup>t</sup> = 6 Hz, 4 H), 3.40 (t, *J*<sup>t</sup> = 6 Hz, 4 H), 3.21 (t, *J*<sup>t</sup> = 6 Hz, 4 H), 3.14 (t, *J*<sup>t</sup> = 6 Hz, 4 H), 1.95 (quint., *J*<sup>qt</sup> = 6 Hz, 4 H), 1.86 (quint., *J*<sup>qt</sup> = 6 Hz, 4 H) ppm. <sup>13</sup>C NMR (CDCl<sub>3</sub>, 100 MHz); 154.5, 150.2, 136.6, 110.4, 48.8, 48.6, 43.9, 43.6, 23.7, 22.8 ppm. HRMS (ESI), *m/z*: 117.62399 [M+2H<sup>+</sup>]<sup>2+</sup> (C<sub>19</sub>H<sub>29</sub>N<sub>7</sub> requires 117.62367), 354.24006 [M+H<sup>+</sup>]<sup>+</sup> (C<sub>19</sub>H<sub>28</sub>N<sub>7</sub> requires 354.24007), 376.22216 [M+Na<sup>+</sup>]<sup>+</sup> (C<sub>19</sub>H<sub>27</sub>N<sub>7</sub>Na requires 376.22201). Anal. Calc. for C<sub>19</sub>H<sub>27</sub>N<sub>7</sub> + 1 H<sub>2</sub>O : C, 61.43; H, 7.87; N, 26.39. Found: C, 61.57; H, 7.95; N, 26.53.

#### *Ru(Ph-tpy)Cl<sub>3</sub>*

Ph-tpy (100 mg, 0.323 mmol) and RuCl<sub>3</sub>(*i*PrSPh)<sub>2</sub>(CH<sub>3</sub>OH) (185 mg, 0.339 mmol) were refluxed in air for 18 h in CH<sub>3</sub>CN (60 mL). After cooling down to r.t., the solvent was evaporated to dryness under vacuum. The dark purple solid obtained was sonicated with EtOH (10 mL) and EtOAc (50 mL) and filtered. The solid product was then washed with EtOH (10 mL) and Et<sub>2</sub>O (2 x 30 mL) and dried under vacuum to give the product as brown solid (160 mg, 96%) and used without any further purification. <sup>1</sup>H NMR (DMSO-*d*<sub>6</sub>, 400 MHz); 9.69 (s, 2 H), 7.34 (s, 2 H), 0.77 (s, 1 H), -1.07 (s, 2 H), -2.52 (s, 2 H), -9.21 (d, *J*<sup>d</sup> = 80 Hz, 4 H), -35.53 (br, s, 2 H) ppm.

*[Ru(Ph-tpy)(L1)](PF<sub>6</sub>)<sub>2</sub> (1)*

A mixture of [Ru(Ph-tpy)Cl<sub>3</sub>] (100 mg, 0.193 mmol) and 4-ethylmorpholine (10 drops) in nitrogen-degassed *n*-butanol (60 mL) was heated at 80 °C for half an hour to give a dark brown-red suspension. After cooling of the mixture to ambient temperature, to the suspension was added L1 (72 mg, 0.203 mmol) and the resulting mixture was refluxed for 12 h under nitrogen atmosphere. After 12 h, the dark purple mixture was cooled down to ambient temperature and solvent was evaporated to dryness. The resulting solid was purified by chromatography on silica using a mixture of 7/1 (v/v) acetonitrile/saturated aq. KNO<sub>3</sub> to afford the pure complex **2** as a purple solid. The nitrate salt was metathesized to the PF<sub>6</sub> salt by addition of saturated aqueous KPF<sub>6</sub> solution to the aqueous solution of the compound. Crystals suitable for X-ray cryatallography were grown by diffusion of diethyl ether into a moderately concentrated solution of the complex in acetone. Yield = 75 mg (37%). <sup>1</sup>H NMR (CD<sub>3</sub>CN, 700 MHz); 8.69 (s, 2 H) 8.54 (d, J<sup>d</sup> = 8.0 Hz, 2 H), 8.14 (t, J<sup>t</sup> = 8.0 Hz, 1 H), 8.09 (dd, J<sup>d</sup> = 8.0 Hz, J<sup>d</sup> = 1.0 Hz, 2 H), 8.05 (dd, J<sup>d</sup> = 6.0 Hz, J<sup>d</sup> = 1.0 Hz, 2 H), 7.99 (td, J<sup>t</sup> = 8.0 Hz, J<sup>d</sup> = 2.0 Hz, 2 H), 7.67 (t, J<sup>t</sup> = 7.0 Hz, 2 H), 7.58 (t, J<sup>t</sup> = 7.0 Hz, 1 H), 7.48 (m, 4 H), 4.04 (m, 2 H), 3.58 (m, 4 H), 3.20 (m, 2 H), 3.05 (m, 4 H), 2.32 (m, 2 H), 2.11 (m, 2 H), 1.67 (m, 2 H), 1.45 (m, 2 H), 1.21 (m, 2 H), 0.85 (m, 2 H) ppm. <sup>13</sup>C NMR (CD<sub>3</sub>CN, 175 MHz); 159.8, 158.8, 155.9, 154.0, 153.9, 143.7, 140.8, 138.2, 137.1, 130.5, 130.3, 128.2, 126.9, 123.9, 120.9, 112.8, 49.6, 48.8, 48.4, 43.8, 23.3, 23.1 ppm. HRMS (ESI), m/z: 909.22556 [M-PF<sub>6</sub>]<sup>+</sup> (C<sub>40</sub>H<sub>42</sub>N<sub>10</sub>PF<sub>6</sub>Ru requires 909.22737), 382.13215 [M-2PF<sub>6</sub>]<sup>2+</sup> (C<sub>40</sub>H<sub>42</sub>N<sub>10</sub>Ru requires 382.13132). Anal. Calc for C<sub>40</sub>H<sub>42</sub>N<sub>10</sub>RuP<sub>2</sub>F<sub>12</sub>: C, 45.59; H, 4.02; N, 13.29. Found: C, 45.68; H, 4.08; N, 13.03.

$[Ru(L1)_2][(PF_6)_3]$  (**2**):

A mixture of  $Ru(DMSO)_4Cl_2$  (50 mg, 0.103 mmol) and **L1** (75 mg, 0.211 mmol) in nitrogen-degassed ethylene glycol (15 mL) was heated at 200 °C for 2x10 minutes in microwave to give a dark brown solution. After cooling down to ambient temperature, solvent was evaporated to dryness. The chloride salt was metathesized to the  $PF_6$  salt by addition of excess of saturated aqueous  $KPF_6$  solution to the aqueous solution of the compound. The resulting brown solid was collected by filtration, washed with water (3x20 mL) and dried under vacuum. The product was purified by silica column chromatography using acetonitrile:saturated aq.  $KNO_3$  (5:2, v/v) as eluent. Crystals suitable for X-ray crystallography were grown by diffusion of diethyl ether into a concentrated solution of **2** in acetone. Yield = 90 mg (80%).  $^1H$  NMR ( $CD_3CN$ , 400 MHz); 27.65 (br, s, 2 H), 18.25 (br, s, 2 H), 8.39 (br, d,  $J^d = 169.6$  Hz, 8 H), 7.09 (br, s, 4 H), 4.59 (br, s, 6 H), 2.99 (br, s, 8 H), 1.46 (br, s, 12 H), 0.54 (br, s, 4 H) 0.09 (br, s, 4 H), -1.02 (br, s, 4 H).  $^{13}C$  NMR ( $CD_3CN$ , 100 MHz); No peaks were observed due to paramagnetism of the complex. HRMS (ESI), m/z: 1098.29753  $[M-PF_6]^+$  ( $C_{38}H_{54}N_{14}RuP_2F_{12}$  requires 1098.29775), 476.66801  $[M-2PF_6]^{2+}$  ( $C_{38}H_{54}N_{14}RuPF_6$  requires 476.66651), 269.45732  $[M-3PF_6]^{3+}$  ( $C_{38}H_{54}N_{14}Ru$  requires 269.45610). Anal. Calc for  $C_{38}H_{54}N_{14}Ru_1P_3F_{18} \cdot 3C_3H_6O$ : C, 39.83; H, 5.12; N, 13.84. Found: C, 39.61; H, 4.80; N, 13.51.

Although after column chromatography and recrystallisation of complex **2**, the thin-layer chromatography displayed a single spot, formation of trace amount of homoleptic *mer*-isomer may not be excluded.

- **NMR Characterisations**

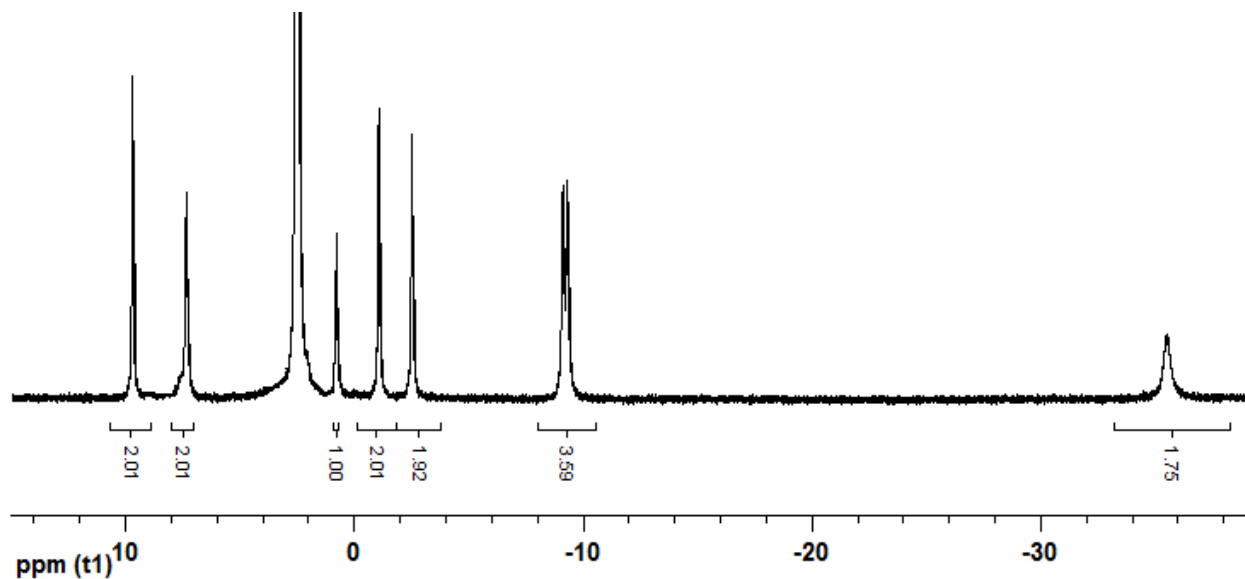

**Figure S1.** <sup>1</sup>H NMR of *Ru(Ph-tpy)Cl<sub>3</sub>* in DMSO-*d*<sub>6</sub> at 400 MHz at room temperature. The peak at 2.50 ppm is the residual solvent peak.

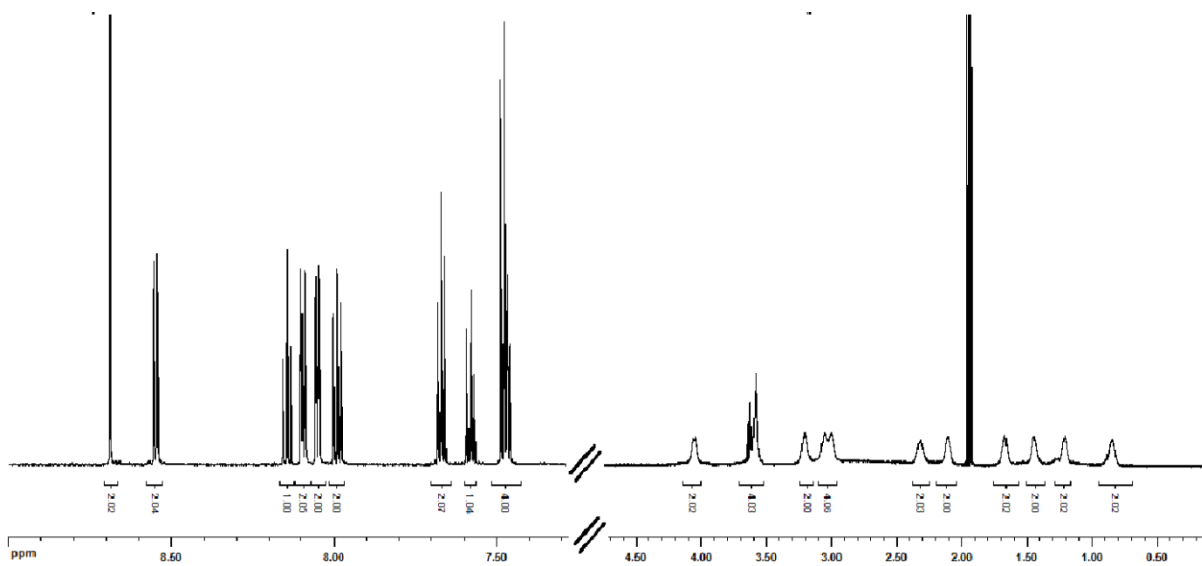

**Figure S2.** <sup>1</sup>H NMR of **1** in CD<sub>3</sub>CN at 700 MHz at room temperature. The peak at 1.94 ppm is the residual solvent peak.

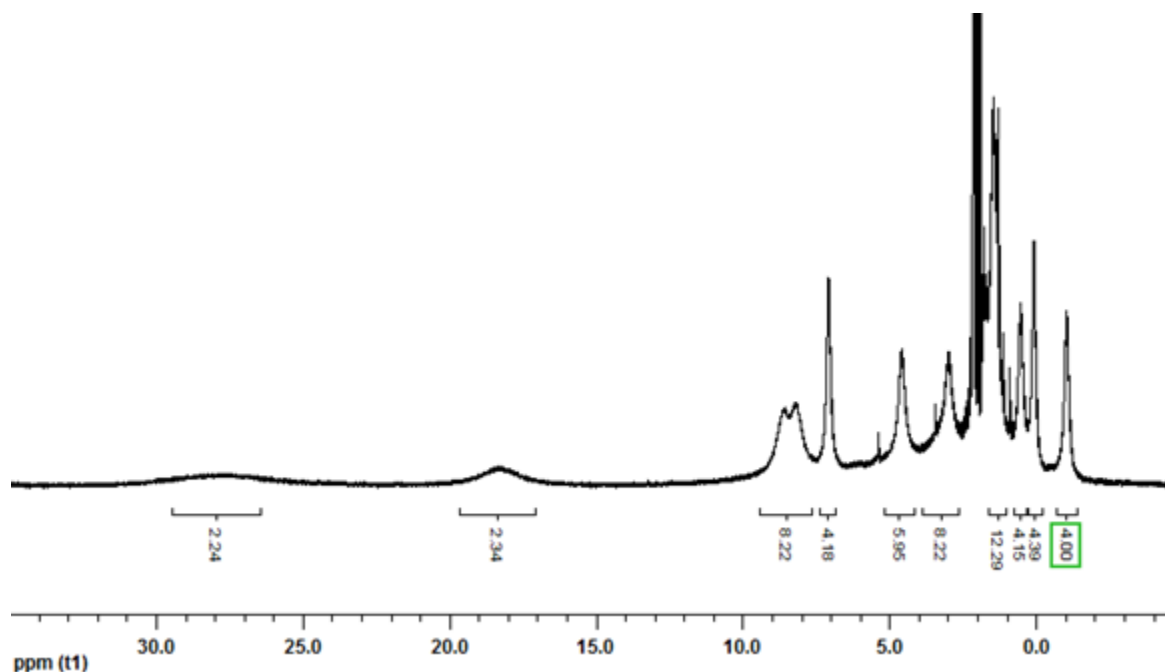

**Figure S3.**  $^1\text{H}$  NMR of **2** in  $\text{CD}_3\text{CN}$  at 400 MHz at room temperature. The peak at 1.94 ppm is the residual solvent peak.

- **X-ray diffraction studies**

Diffraction data were collected on a Bruker SMART 6000 with Montel 200 monochromator, equipped with a rotating anode source for  $\text{Cu K}\alpha$  radiation. The diffraction quality of the crystals were checked, revealing in some cases poor diffraction with a large amount of diffuse scattering, signaling extensive crystal disorder. Cell refinement and data reduction were done using APEX2.<sup>6</sup> Absorption corrections were applied using SADABS.<sup>7</sup> Structures were solved by direct methods using SHELXS97 and refined on  $F^2$  by full-matrix least squares using SHELXL97.<sup>8</sup> All non-hydrogen atoms were refined anisotropically. Hydrogen atoms were refined isotropic on calculated positions using a riding model. For complex **1**, during the refinement of its structure, electron density peaks were located and were believed to be six severely disordered solvated acetone molecules (by counting the number of electrons suppressed). All the attempts made to model the solvent molecules were not successful and they were removed using the SQUEEZE



routine from PLATON,<sup>9</sup> which resulted in a significant improvement of R1 factor by ~3.5% in the squeezed structure. The highest difference peak is located 1.09 Å from atom F4 and the deepest hole is 0.51 Å from atom F1A. In addition, three peaks of density ~ 2 to 1 e/Å<sup>3</sup> were present essentially due to the quality of the crystal employed, which was the best available, and is believed to be due to the frequent discrete positional disorder of the freely rotating PF<sub>6</sub> anions. Several fluorine atoms were found to be positionally disordered, each of which were modelled as two components and refined anisotropically. Some atomic displacement restraints were applied among the disorder components to model the anion positions but not applicable for the cation structure.

For complex **2**, the highest difference peak is located 0.97 Å from atom F12B and the deepest hole is 0.36 Å from the atom F8, which are believed to be due to positional disorder arising from freely rotating PF<sub>6</sub> anions. One PF<sub>6</sub> anion was found with a significant degree of rotational disorder about the central P atom over two positions, with occupancy ratios [44:56] and [38:62] and both of them refined anisotropically. Some equivalent atomic displacement parameter (EADP) restraints were applied for few carbon atoms but not applicable for the entire cationic structure.

- **Additional discussion about crystallography**

The geometry optimized structures by DFT calculations of both **1** and **2** are in reasonable agreement with their respective X-ray structures (for a relative comparison of the bond distances and angles, as measured by X-ray data and DFT calculations for **1** and **2**, see Table S2). The Ru-N bond distance [1.946 (2) Å] to central pyridine ring of Ph-tpy is the shortest and the bond lengths closely resemble those observed in [Ru(Ph-tpy)<sub>2</sub>][PF<sub>6</sub>]<sub>2</sub>.<sup>10</sup> As ligand **L1** is flexible, the **hpp** moieties in complex **1** were found to be twisted from each other by 71.0(3)°. The average C-

N-C-N dihedral angle of 52.4(4)<sup>o</sup> (average of <C40-N6-C22-N7 (49.9(4)<sup>o</sup> and <C33-N8-C26-N7 (55.0(4)<sup>o</sup>) indicates a broken  $\pi$ -conjugation between the pyridyl and the hpp units. Unlike the typical meridional heteroleptic Tpy-Ru<sup>II</sup>-Tpy (where Tpy = substituted tpy) complexes, where the shortest Ru-N distances are (2.037(3)-2.043(3) Å) found between Ru-atom and the central py unit,<sup>11</sup> all the Ru-N distances in complex 2 are found to be similar (2.053(3)-2.074(4) Å).

**Table S1.** Crystallographic data of **1**·[6(C<sub>3</sub>H<sub>6</sub>O)] and **2**·[(C<sub>3</sub>H<sub>6</sub>O)].

| Compound                                                                      | <b>1</b> ·[6(C <sub>3</sub> H <sub>6</sub> O)]                                                                             | <b>2</b> ·[C <sub>3</sub> H <sub>6</sub> O]                                                                             |
|-------------------------------------------------------------------------------|----------------------------------------------------------------------------------------------------------------------------|-------------------------------------------------------------------------------------------------------------------------|
| CCDC Number                                                                   | 978431                                                                                                                     | 922650                                                                                                                  |
| Formula                                                                       | [C <sub>40</sub> H <sub>42</sub> N <sub>10</sub> Ru][PF <sub>6</sub> ] <sub>2</sub> , [6(C <sub>3</sub> H <sub>6</sub> O)] | [C <sub>38</sub> H <sub>54</sub> N <sub>14</sub> Ru][PF <sub>6</sub> ] <sub>3</sub> , [C <sub>3</sub> H <sub>6</sub> O] |
| <i>M<sub>w</sub></i> (g/mol); <i>d</i> <sub>calcd.</sub> (g/cm <sup>3</sup> ) | 1402.31; 2.028                                                                                                             | 1301.01; 1.714                                                                                                          |
| <i>T</i> (K); F(000)                                                          | 100(2); 5808                                                                                                               | 100(2); 2652                                                                                                            |
| Crystal System                                                                | Monoclinic                                                                                                                 | Orthorhombic                                                                                                            |
| Space Group                                                                   | C2/c                                                                                                                       | P2 <sub>1</sub> 2 <sub>1</sub> 2 <sub>1</sub>                                                                           |
| Unit Cell:                                                                    |                                                                                                                            |                                                                                                                         |
| <i>a</i> (Å)                                                                  |                                                                                                                            | 12.30660(10)                                                                                                            |
| <i>b</i> (Å)                                                                  | 40.9186(5)                                                                                                                 |                                                                                                                         |
| <i>c</i> (Å)                                                                  | 12.9990(2)                                                                                                                 | 12.6126(2)                                                                                                              |
| <i>α</i> (°)                                                                  | 19.2466(2)                                                                                                                 | 32.4825(4)                                                                                                              |
| <i>β</i> (°)                                                                  | 90                                                                                                                         | 90                                                                                                                      |
| <i>γ</i> (°)                                                                  | 116.184(1)                                                                                                                 | 90                                                                                                                      |
| <i>V</i> (Å <sup>3</sup> ); <i>Z</i>                                          | 90                                                                                                                         | 90                                                                                                                      |
| <i>V</i> (Å <sup>3</sup> ); <i>Z</i>                                          | 9186.7(2); 8                                                                                                               | 5041.88(11); 4                                                                                                          |
| $\theta$ range (°); completeness                                              | 2.41-70.71; 0.996                                                                                                          | 2.72-71.15; 0.997                                                                                                       |
| R <sub>file</sub> :collec./indep.; R <sub>int</sub>                           | 177747/8737; 0.0265                                                                                                        | 67140/9381; 0.0296                                                                                                      |
| $\mu$ (mm <sup>-1</sup> )                                                     | 4.533                                                                                                                      | 4.487                                                                                                                   |
| R1(F); wR(F <sup>2</sup> ); GoF(F <sup>2</sup> ) <sup>a</sup>                 | 0.0468; 0.1299; 1.038                                                                                                      | 0.0367; 0.0978; 1.025                                                                                                   |
| Residual electron density                                                     | 1.914; -0.777                                                                                                              | 1.196; -1.134                                                                                                           |

<sup>a</sup>R1(F) based on observed reflections with I>2 $\sigma$ (I) for **1**·[6(C<sub>3</sub>H<sub>6</sub>O)] and **2**·[C<sub>3</sub>H<sub>6</sub>O]; wR(F<sup>2</sup>) and GoF(F<sup>2</sup>) based on all data for all compounds.

**Table S2.** Selected bond distances and angles of **1**·[6(C<sub>3</sub>H<sub>6</sub>O)] and **2**·[(C<sub>3</sub>H<sub>6</sub>O)].

| Compound                                       | Bond Length                                   |                    | Angle          |             |                  |                |
|------------------------------------------------|-----------------------------------------------|--------------------|----------------|-------------|------------------|----------------|
|                                                |                                               | Obs.<br>(X-ray)    | Calc.<br>(DFT) |             | Obs.<br>(X-ray)  | Calc.<br>(DFT) |
| <b>1</b> ·[6(C <sub>3</sub> H <sub>6</sub> O)] | N1-Ru1                                        | 2.0646<br>(0.0024) | 2.12887        | N1-Ru1-N3   | 159.28<br>(0.10) | 157.256        |
|                                                | N2-Ru1                                        | 1.9462<br>(0.0024) | 1.98758        | N4-Ru1-N10  | 173.83<br>(0.10) | 172.513        |
|                                                | N3-Ru1                                        | 2.0761<br>(0.0025) | 2.12874        |             |                  |                |
|                                                | N4-Ru1                                        | 2.0711<br>(0.0025) | 2.13996        |             |                  |                |
|                                                | N7-Ru1                                        | 2.0720<br>(0.0025) | 2.11279        |             |                  |                |
|                                                | N10-Ru1                                       | 2.0919<br>(0.0026) | 2.13997        |             |                  |                |
|                                                | N4-C40                                        | 1.3050<br>(0.0039) | 1.31063        |             |                  |                |
|                                                | N5-C40                                        | 1.3498<br>(0.0043) | 1.36487        |             |                  |                |
|                                                | N6-C40                                        | 1.4072<br>(0.0040) | 1.40913        |             |                  |                |
|                                                | N10-C33                                       | 1.3102<br>(0.0043) | 1.31062        |             |                  |                |
|                                                | N9-C33                                        | 1.3430<br>(0.0045) | 1.36485        |             |                  |                |
|                                                | N8-C33                                        | 1.3998<br>(0.0043) | 1.40917        |             |                  |                |
|                                                | <b>2</b> ·[(C <sub>3</sub> H <sub>6</sub> O)] | Ru1-N1             | 2.066(2)       | 2.11983     | N1-Ru1-N4        | 83.47(10)      |
| Ru1-N4                                         |                                               | 2.053(3)           | 2.12115        | N1-Ru1-N7   | 84.34(10)        | 82.526         |
| Ru1-N7                                         |                                               | 2.067(3)           | 2.11459        | N4-Ru1-N7   | 92.17(10)        | 91.774         |
| Ru1-N8                                         |                                               | 2.062(2)           | 2.11984        | N8-Ru1-N11  | 84.03(10)        | 82.525         |
| Ru1-N11                                        |                                               | 2.074(3)           | 2.11450        | N8-Ru1-N14  | 82.60(10)        | 82.461         |
| Ru1-N14                                        |                                               | 2.071(3)           | 2.12122        | N11-Ru1-N14 | 92.00(11)        | 91.772         |
|                                                |                                               |                    |                | N1-Ru1-N14  | 178.14(10)       | 175.528        |
|                                                |                                               |                    |                | N4-Ru1-N8   | 177.74(10)       | 175.532        |
|                                                |                                               |                    |                | N7-Ru1-N11  | 171.04(10)       | 172.724        |

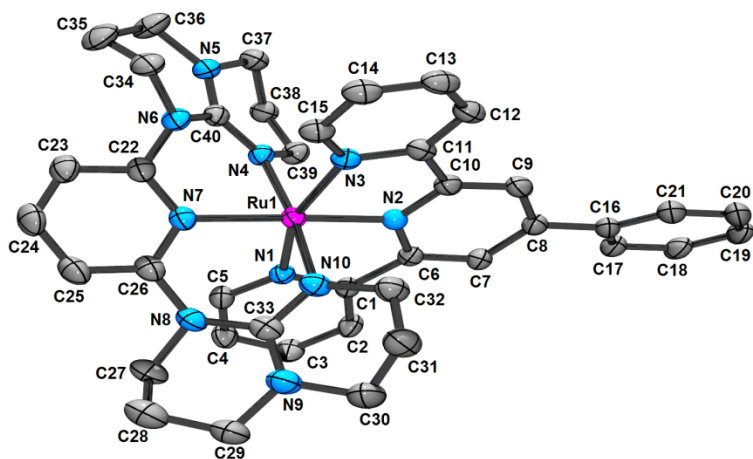

**Figure S4.** View of ORTEP diagram of **1** (ellipsoids correspond to a 50% probability level), with complete labeling. Hydrogen atoms, anions and solvent molecules are omitted for clarity.

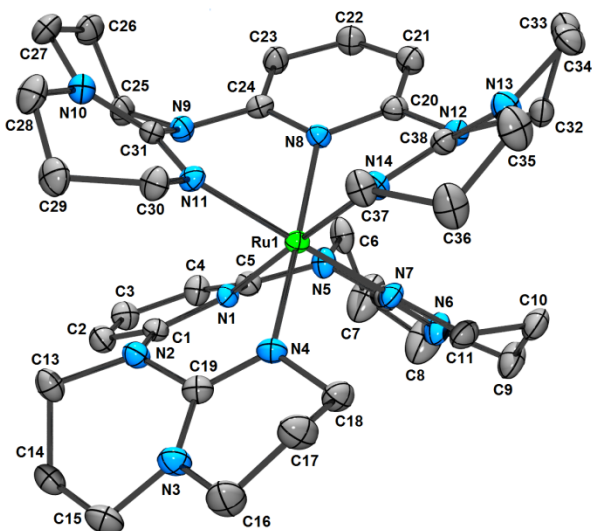

**Figure S5.** View of ORTEP diagram of **2** (ellipsoids correspond to a 50% probability level), with complete labeling. Hydrogen atoms, anions and solvent molecules are omitted for clarity.

## • Electrochemical data

**Table S3.** Electrochemical data for **L1**, **1**, **2** and some reference compounds.

| Compound                                                               | $E_{1/2}(\text{ox})^a$ |                         | $E_{1/2}(\text{red})^a$ |            | $\Delta E_{1/2}^b$ |
|------------------------------------------------------------------------|------------------------|-------------------------|-------------------------|------------|--------------------|
|                                                                        |                        |                         |                         |            |                    |
| <b>L1</b>                                                              | 1.11 (308)             | 0.77 (irr) <sup>c</sup> | -----                   |            | -----              |
| <b>1</b>                                                               | -----                  | 0.50 (94)               | -1.47 (70)              | -2.01 (84) | 1.97               |
| <b>2</b>                                                               | 1.18 (147)             | -----                   | -0.29 (138)             |            | 1.47               |
| [Ru(tpy) <sub>2</sub> ][(PF <sub>6</sub> ) <sub>2</sub> ] <sup>d</sup> | 1.31 (60)              | -----                   | -1.23 (70)              | -1.47 (69) | 2.54               |
| [Ru(Ph-tpy) <sub>2</sub> ] <sup>2+e</sup>                              | 1.29                   | -----                   | -1.26                   |            | 2.55               |
| [Ru(tpy)(N <sup>^</sup> C <sup>^</sup> N)] <sup>+f,g</sup>             | -----                  | 0.51 (62)               | -1.55 (63)              |            | 2.06               |

<sup>a</sup>Potentials are in volts vs. SCE for acetonitrile solutions, 0.1 M in [*n*-Bu<sub>4</sub>N]PF<sub>6</sub>, recorded at 25 ± 1 °C at a sweep rate as mentioned in experimental section. The difference between cathodic and anodic peak potentials (millivolts) is given in parentheses. <sup>b</sup>Difference between the first oxidation and first reduction potentials (volt). <sup>c</sup>Irreversible; potential is given for the anodic wave. <sup>d</sup>From ref. 12. <sup>e</sup>From ref. 13. <sup>f</sup>From ref. 14. <sup>g</sup>N<sup>^</sup>C<sup>^</sup>N = 1,3-di(2-pyridyl)benzene.

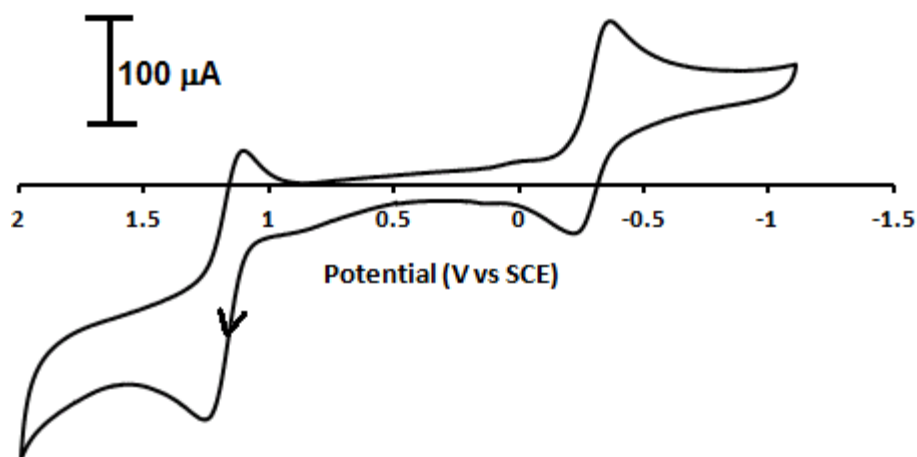

**Figure S6.** Cyclic voltammogram of **2** in dry, degassed CH<sub>3</sub>CN, recorded at a scan rate of 25 mV/s.

- **DFT, TD-DFT calculations and UV-vis absorption and Emission data**

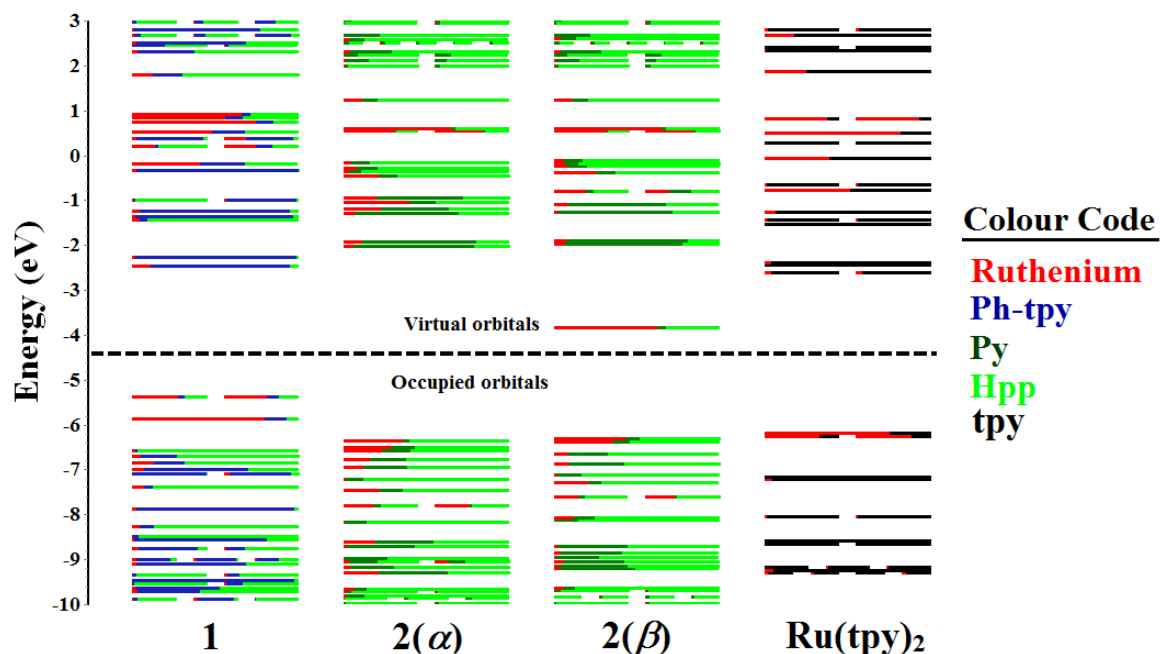

**Figure S7.** Calculated frontier MO energies of all the modeled **1**, **2** and Ru(tpy)<sub>2</sub> complexes obtained from DFT(b3lyp/LanL2DZ(f))[Ru]6-31G\*\*[NCN] with CPCM(CH<sub>3</sub>CN) and 0.05 eV of threshold of degeneracy. Restricted closed shell model was applied for diamagnetic complexes, **1** and Ru(tpy)<sub>2</sub>, while unrestricted open shell model was applied for paramagnetic complex, **2**.

**Table S4.** MO composition of Ru(tpy)<sub>2</sub><sup>2+</sup> in singlet (S=0) ground state (rb3lyp/LanL2DZ(f)[Ru]6-31G\*\*[C,H,N]).

| MO          | Energy (eV)  | Approximate Composition (%) |           |
|-------------|--------------|-----------------------------|-----------|
|             |              | Ru                          | tpy       |
| LUMO+5      | -1.44        | 1                           | 99        |
| LUMO+4      | -1.53        | 0                           | 100       |
| LUMO+3      | -2.37        | 3                           | 97        |
| LUMO+2      | -2.44        | 0                           | 100       |
| LUMO+1      | -2.60        | 7                           | 93        |
| <b>LUMO</b> | <b>-2.60</b> | <b>7</b>                    | <b>93</b> |
| <b>HOMO</b> | <b>-6.18</b> | <b>70</b>                   | <b>30</b> |
| HOMO-1      | -6.25        | 72                          | 28        |
| HOMO-2      | -6.26        | 72                          | 28        |
| HOMO-3      | -7.16        | 0                           | 100       |
| HOMO-4      | -7.21        | 3                           | 97        |
| HOMO-5      | -8.03        | 2                           | 98        |

**Table S5.** MO composition of  $1^{2+}$  in singlet ( $S=0$ ) ground state (rb3lyp/LanL2DZ(f)[Ru]6-31G\*\*[C,H,N]).

| MO          | Energy (eV)  | Approximate Composition (%) |           |           |
|-------------|--------------|-----------------------------|-----------|-----------|
|             |              | Ru                          | Ph-tpy    | L1        |
| LUMO+5      | -0.99        | 1                           | 1         | 98        |
| LUMO+4      | -1.25        | 3                           | 95        | 2         |
| LUMO+3      | -1.36        | 1                           | 99        | 0         |
| LUMO+2      | -1.43        | 4                           | 2         | 94        |
| LUMO+1      | -2.27        | 2                           | 98        | 0         |
| <b>LUMO</b> | <b>-2.46</b> | <b>9</b>                    | <b>88</b> | <b>2</b>  |
| <b>HOMO</b> | <b>-5.37</b> | <b>57</b>                   | <b>18</b> | <b>25</b> |
| HOMO-1      | -5.37        | 61                          | 10        | 29        |
| HOMO-2      | -5.86        | 84                          | 10        | 6         |
| HOMO-3      | -6.56        | 2                           | 1         | 97        |
| HOMO-4      | -6.69        | 5                           | 26        | 70        |
| HOMO-5      | -6.85        | 13                          | 22        | 66        |

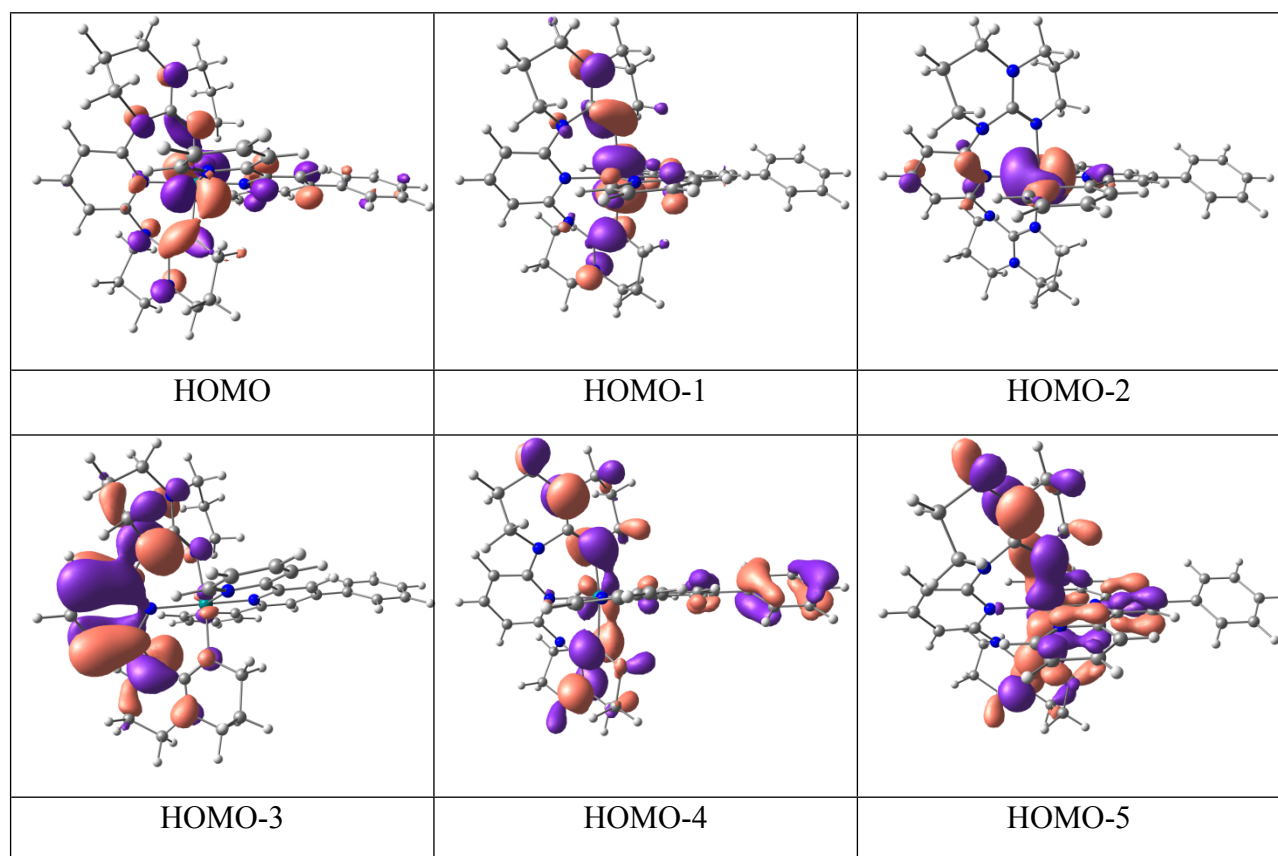

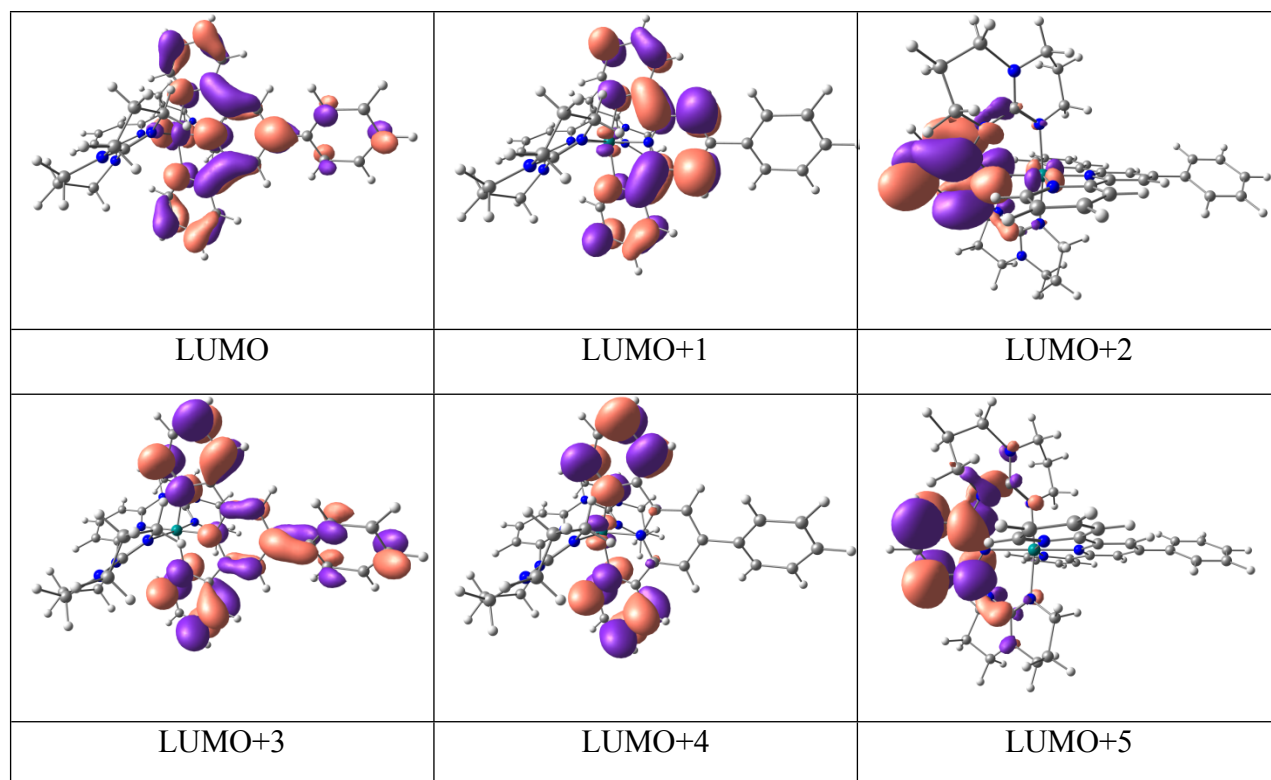

**Figure S8.** Kohn-Sham electron density sketches in different MOs for  $1^{2+}$  in ( $S=0$ ) ground state

**Table S6.** UV-vis absorption data of **L1**, **1**, **2** in dry degassed acetonitrile and some reference compounds.

| Compound                                                                 | $\lambda_{\text{max}}$ , nm ( $\epsilon \times 10^3$ , $\text{M}^{-1}\text{cm}^{-1}$ ) |            |           |            |           |           |           |
|--------------------------------------------------------------------------|----------------------------------------------------------------------------------------|------------|-----------|------------|-----------|-----------|-----------|
| <b>L1</b>                                                                | 228 (29.0)                                                                             | 311 (12.8) |           |            |           |           |           |
| <b>1</b>                                                                 | 225 (26.2)                                                                             | 244 (22.6) | 289(26.9) | 317 (13.3) | 379 (6.1) | 541 (5.0) | 622 (3.3) |
| <b>2</b>                                                                 | 234 (35.2)                                                                             | 326 (12.8) | 433 (3.9) | 564 (1.9)  |           |           |           |
| $\text{Ru}(\text{tpy})_2^{2+a}$                                          | 270(40.9)                                                                              | 307(66.7)  | 475(15.3) |            |           |           |           |
| $\text{Ru}(\text{tpy})(\text{N}^{\wedge}\text{C}^{\wedge}\text{N})^{+b}$ | 243(49.8)                                                                              | 277(47.0)  | 315(37.0) | 368(sh)    | 424(9.6)  | 499(14.4) |           |

<sup>a</sup>From ref 15. <sup>b</sup>From ref 14.



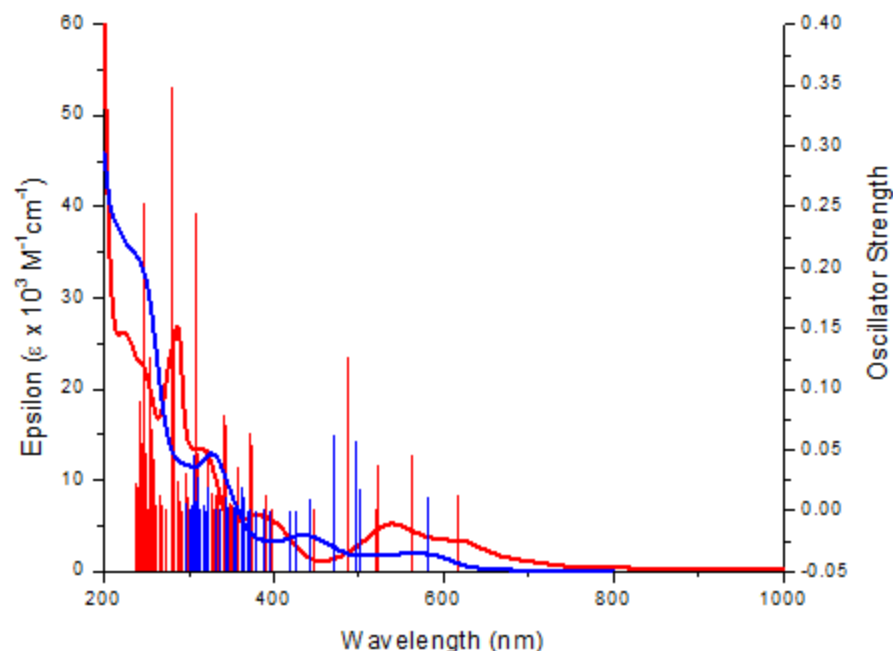

**Figure S9.** Overlay of experimental (curved lines) absorption spectra and calculated (straight lines) oscillator strengths at different wavelengths of **1** (red) and **2** (blue), at ambient temperature in dry acetonitrile.

**Table S7.** Selected transitions from TD-DFT calculations of  $1^{2+}$  in the singlet ground state (rb3lyp/LanL2DZ(f)[Ru]6-31G\*\*[C,H,N], CPCM (CH<sub>3</sub>CN)).

| energy (eV) | $\lambda$ /nm | $\lambda$ /nm ( $\epsilon \times 10^3$ M <sup>-1</sup> cm <sup>-1</sup> ) [expt.] | f      | transition                                     | character                                                    |
|-------------|---------------|-----------------------------------------------------------------------------------|--------|------------------------------------------------|--------------------------------------------------------------|
| 5.03        | 246           | 244(22.6)                                                                         | 0.2525 | H-3->L+5 (68%)                                 | hpp( $\pi$ ) to hpp( $\pi^*$ ) &/or hpp(n) to hpp( $\pi^*$ ) |
| 4.44        | 279           | 289(26.9)                                                                         | 0.3477 | H-7->L+1 (61%),<br>H-8->L+1 (13%)              | tpy( $\pi$ ) to tpy( $\pi^*$ )                               |
| 4.02        | 308           | 317(13.3)                                                                         | 0.2449 | H-7->L (51%)                                   | tpy( $\pi$ ) to tpy( $\pi^*$ )                               |
| 3.34        | 371           | 379(6.1)                                                                          | 0.0632 | H-1->L+3 (92%)                                 | Ru(d $\pi$ ) to tpy( $\pi^*$ )                               |
| 2.20        | 562           | 541(5.0)                                                                          | 0.0444 | H->L (64%),<br>H-1->L+1 (20%),<br>H-2->L (10%) | Ru(d $\pi$ ) to tpy( $\pi^*$ )                               |
| 2.01        | 616           | 622(3.3)                                                                          | 0.0117 | H-1->L (94%)                                   | Ru(d $\pi$ ) to tpy( $\pi^*$ )                               |

**Table S8.** MO composition of  $2^{3+}$  in ( $S=1$ ) ground state in  $\alpha$ -spin (ub3lyp/LanL2DZ(f)[Ru]6-31G\*\*[C,H,N]).

| MO          | Energy (eV)  | Composition |           |           |
|-------------|--------------|-------------|-----------|-----------|
|             |              | Ru          | Py        | hpp       |
| LUMO+5      | -0.95        | 21          | 58        | 21        |
| LUMO+4      | -1.04        | 50          | 17        | 34        |
| LUMO+3      | -1.18        | 27          | 46        | 28        |
| LUMO+2      | -1.29        | 7           | 74        | 19        |
| LUMO+1      | -1.93        | 11          | 76        | 13        |
| <b>LUMO</b> | <b>-2.02</b> | <b>5</b>    | <b>82</b> | <b>13</b> |
| <b>HOMO</b> | <b>-6.35</b> | <b>31</b>   | <b>3</b>  | <b>65</b> |
| HOMO-1      | -6.50        | 26          | 18        | 56        |
| HOMO-2      | -6.57        | 20          | 22        | 58        |
| HOMO-3      | -6.77        | 14          | 26        | 60        |
| HOMO-4      | -6.95        | 11          | 32        | 57        |
| HOMO-5      | -7.20        | 1           | 13        | 86        |

**Table S9.** MO composition of  $2^{3+}$  in ( $S=1$ ) ground state in  $\beta$ -spin (ub3lyp/LanL2DZ(f)[Ru]6-31G\*\*[C,H,N]).

| MO          | Energy (eV)  | Composition |           |           |
|-------------|--------------|-------------|-----------|-----------|
|             |              | Ru          | Py        | hpp       |
| LUMO+5      | -0.82        | 56          | 9         | 34        |
| LUMO+4      | -1.09        | 9           | 68        | 24        |
| LUMO+3      | -1.27        | 2           | 80        | 18        |
| LUMO+2      | -1.89        | 8           | 80        | 12        |
| LUMO+1      | -1.97        | 6           | 81        | 14        |
| <b>LUMO</b> | <b>-3.84</b> | <b>65</b>   | <b>5</b>  | <b>29</b> |
| <b>HOMO</b> | <b>-6.30</b> | <b>41</b>   | <b>10</b> | <b>49</b> |
| HOMO-1      | -6.39        | 33          | 13        | 55        |
| HOMO-2      | -6.66        | 8           | 28        | 64        |
| HOMO-3      | -6.87        | 8           | 40        | 52        |
| HOMO-4      | -7.11        | 1           | 18        | 81        |
| HOMO-5      | -7.28        | 20          | 8         | 72        |
| HOMO-6      | -7.59        | 38          | 2         | 60        |
| HOMO-7      | -7.61        | 32          | 10        | 58        |
| HOMO-8      | -8.07        | 13          | 11        | 75        |
| HOMO-9      | -8.12        | 1           | 15        | 84        |
| HOMO-10     | -8.70        | 0           | 51        | 49        |

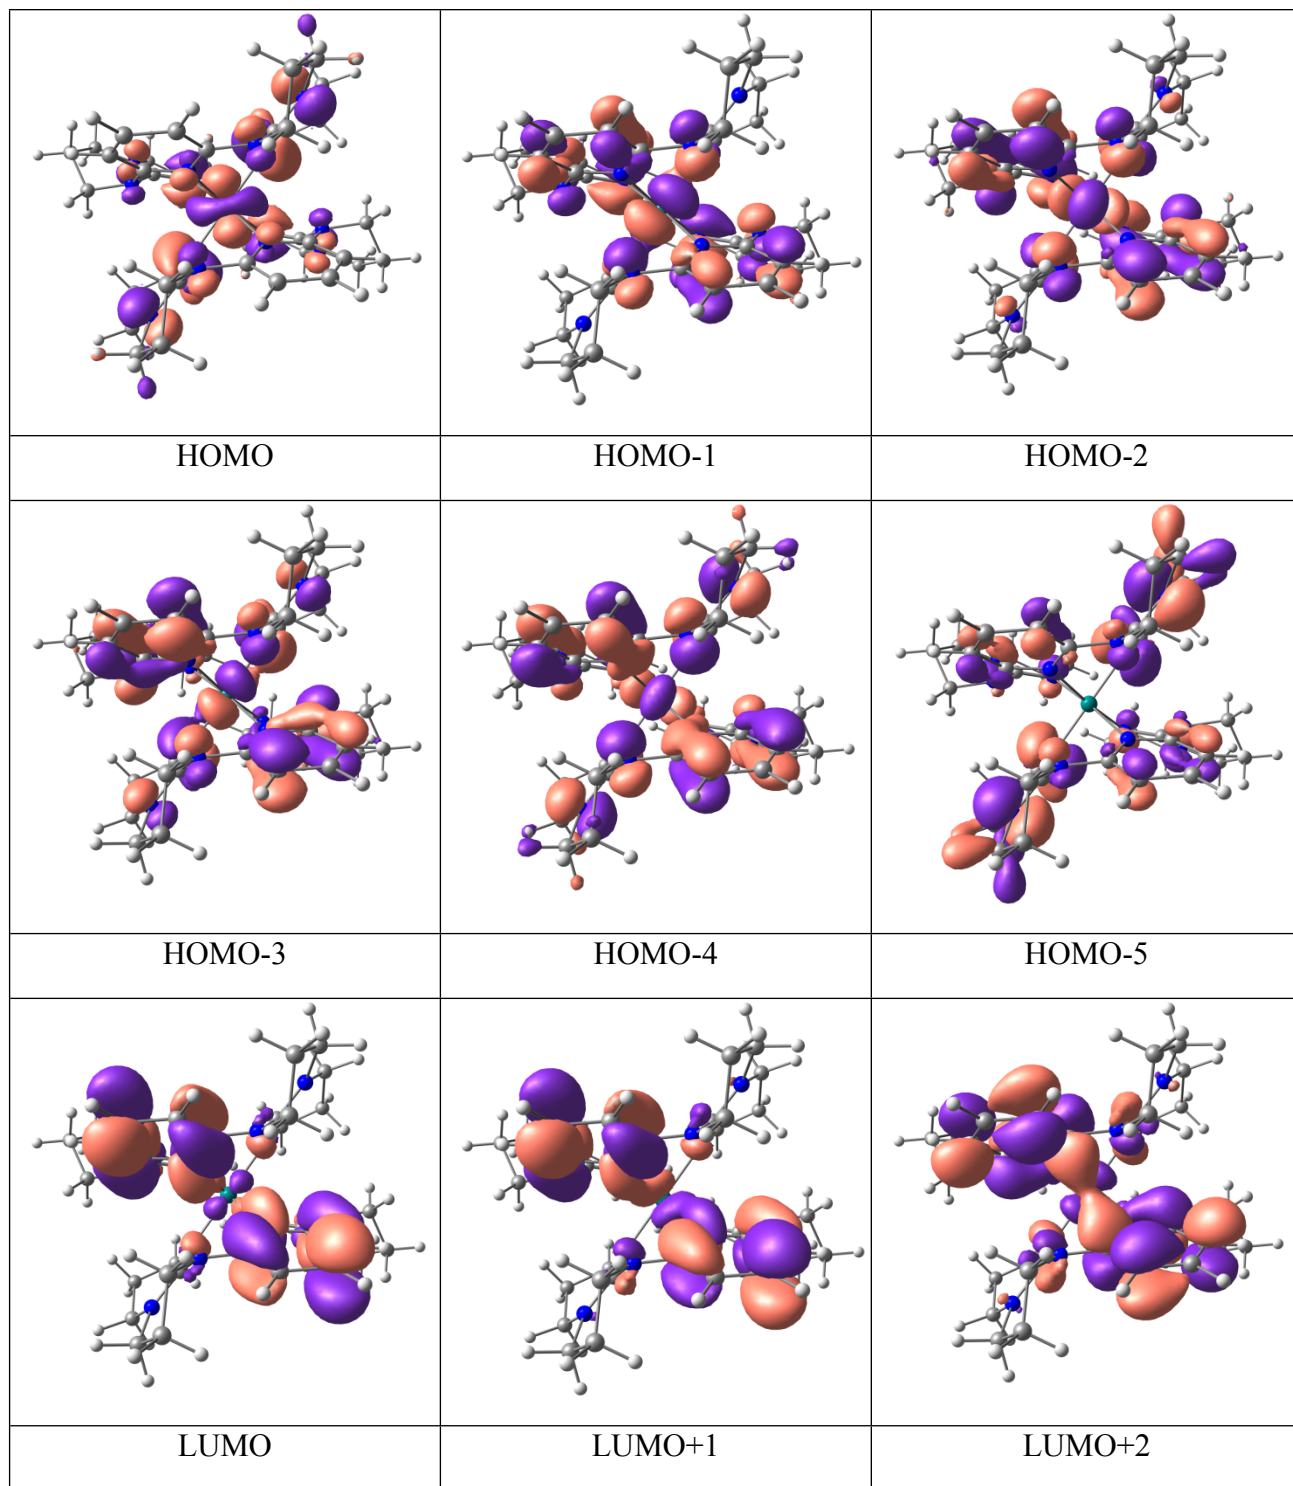

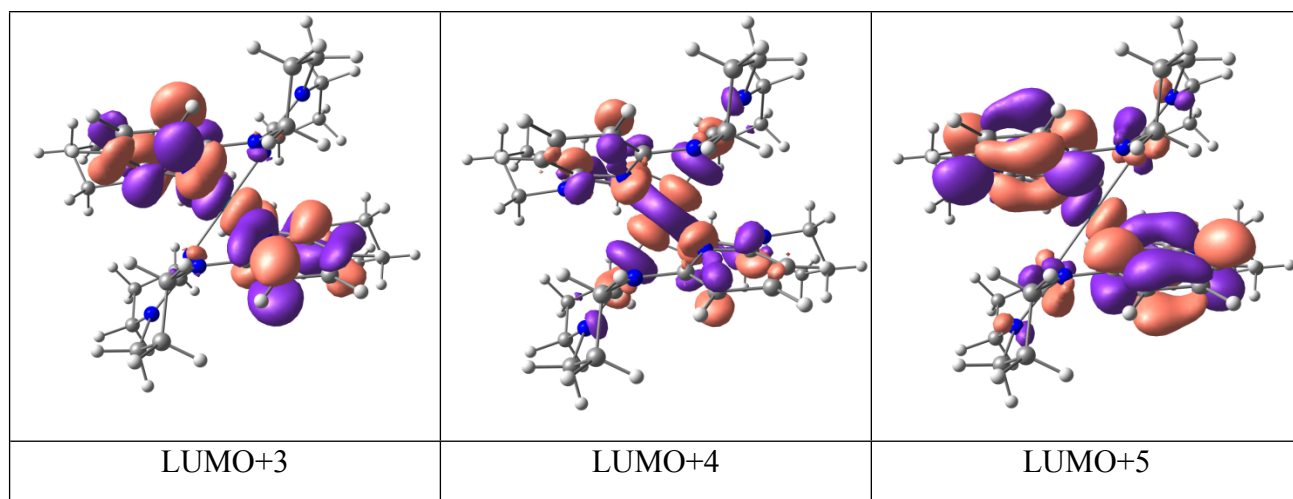

**Figure S10.** Kohn-Sham electron density sketches of different MOs for  $2^{3+}$  in ( $S=1$ ) ground state in  $\alpha$ -spin

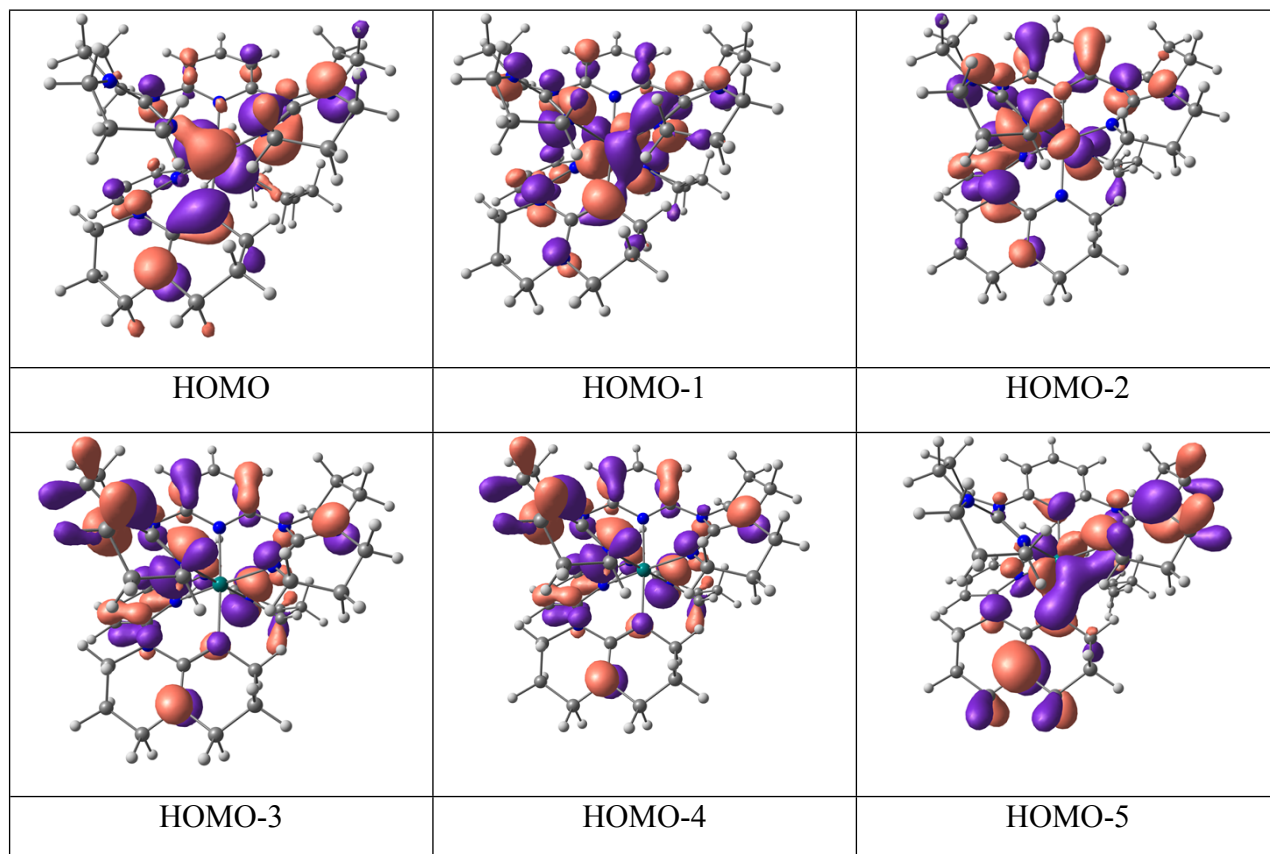

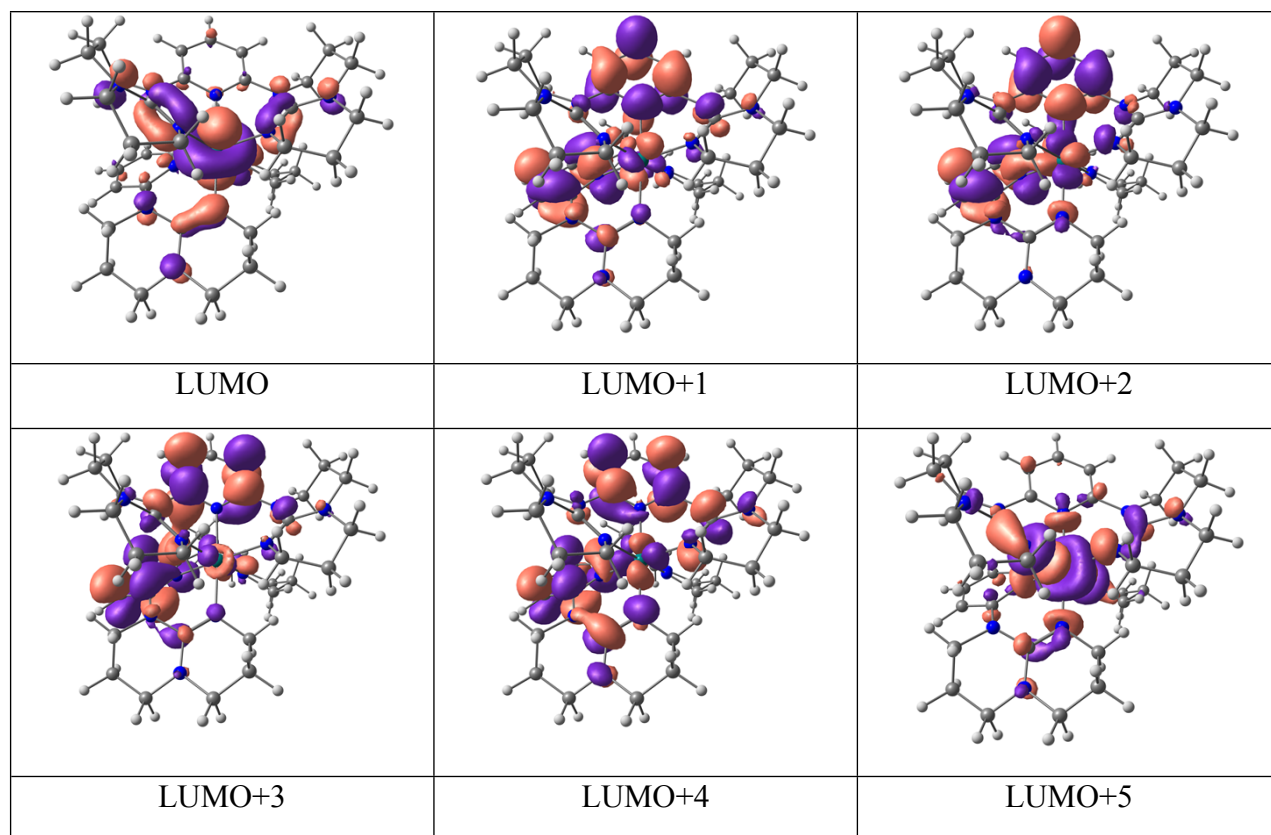

**Figure S11.** Kohn-Sham electron density sketches of different MOs for  $2^{3+}$  in ( $S=1$ ) ground state in  $\beta$ -spin

**Table S10.** Selected transitions from TD-DFT calculations of  $2^{3+}$  in the ground state (ub3lyp/LanL2DZ(f)[Ru]6-31G\*\*[C,H,N], CPCM (CH<sub>3</sub>CN)).

| Energy (eV) | $\lambda/\text{nm}$ | $\lambda/\text{nm}$ ( $\epsilon \times 10^3$ M <sup>-1</sup> cm <sup>-1</sup> ) [expt.] | f      | Major transition(s)                                                                                                                                     | character                                                                          |
|-------------|---------------------|-----------------------------------------------------------------------------------------|--------|---------------------------------------------------------------------------------------------------------------------------------------------------------|------------------------------------------------------------------------------------|
| 3.84        | 323                 | 326 (12.8)                                                                              | 0.0116 | H-10( $\beta$ ) $\rightarrow$ L( $\beta$ ) (61%)                                                                                                        | Py/hpp(n/ $\pi$ ) to Ru(d $\pi$ ) (major) + Py/hpp(n/ $\pi$ ) to Py/hpp( $\pi^*$ ) |
| 2.64        | 469                 | 433 (3.9)                                                                               | 0.0623 | H-6( $\beta$ ) $\rightarrow$ L( $\beta$ ) (81%)                                                                                                         | hpp(n/ $\pi$ ) to Ru(d $\pi$ ) (major) + Ru(d $\pi$ ) to hpp( $\pi^*$ ) (minor)    |
| 2.13        | 581                 | 564 (1.9)                                                                               | 0.0111 | H-3( $\beta$ ) $\rightarrow$ L( $\beta$ ) (59%),<br>H-1( $\beta$ ) $\rightarrow$ L( $\beta$ ) (23%),<br>H-5( $\beta$ ) $\rightarrow$ L( $\beta$ ) (12%) | Py/hpp(n/ $\pi$ ) to Ru(d $\pi$ ) (major) + Ru(d $\pi$ ) to hpp( $\pi^*$ ) (minor) |

**Table S11.** Emission data of **L1** and **1**, **2** in dry degassed acetonitrile and some reference compounds.

| Compound                                               | Excited at<br>$\lambda_{\max}$ , nm | Luminescence at 298 K |             |                              |
|--------------------------------------------------------|-------------------------------------|-----------------------|-------------|------------------------------|
|                                                        |                                     | $\lambda_{\max}$ , nm | $\tau$ , ns | $\Phi$ (x 10 <sup>-6</sup> ) |
| <b>L1</b>                                              | 228, 311                            | 360                   |             |                              |
| <b>1</b>                                               | 622, 541                            | <b>901</b>            | <b>129</b>  | <b>1000</b>                  |
| <b>2</b>                                               | 564, 433                            | -----                 | -----       | -----                        |
| Ru(tpy) <sub>2</sub> <sup>2+a</sup>                    | 475                                 | 629                   | 0.25        | < 5                          |
| Ru(Ph-tpy) <sub>2</sub> <sup>2+a</sup>                 | 488                                 | 715                   | 1.0         | 40                           |
| Ru(tpy)(N <sup>^</sup> C <sup>^</sup> N) <sup>+b</sup> | 499                                 | 781                   | -----       | 9.4                          |

<sup>a</sup>From ref 13 (using Ru(bpy)<sub>3</sub>(PF<sub>6</sub>)<sub>2</sub> ( $\Phi$  = 0.028) as standard). <sup>b</sup>From ref 14 (using Ru(bpy)<sub>3</sub>(PF<sub>6</sub>)<sub>2</sub> ( $\Phi$  = 0.062) as standard).

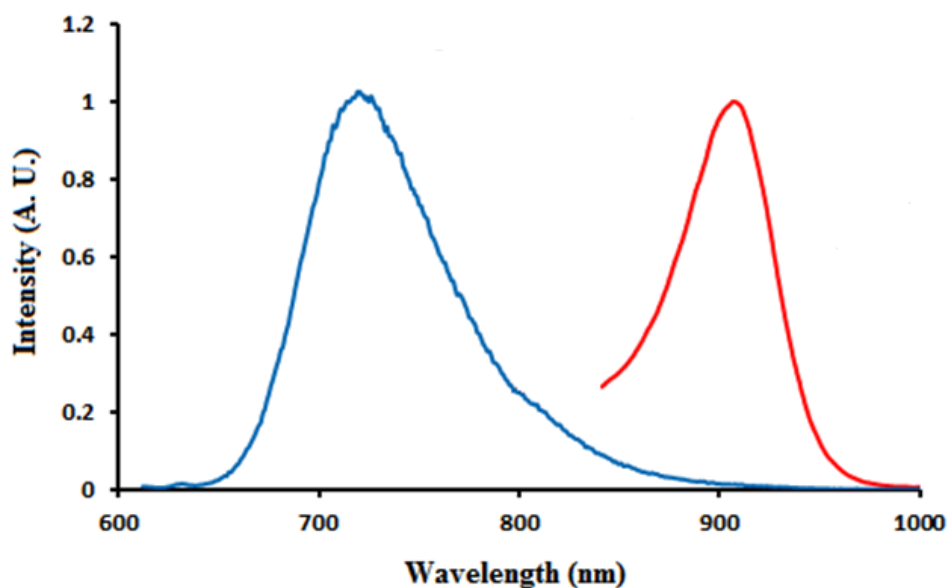

**Figure S12.** Emission spectra of complexes [Ru(Ph-tpy)<sub>2</sub>][(PF<sub>6</sub>)<sub>2</sub>] (blue) and **1** (red), corrected for photomultiplier response.

- **Additional DFT data**

Computational details:

All calculations were performed with the Gaussian03<sup>16</sup> employing the DFT method, the Becke three-parameter hybrid functional,<sup>17</sup> and Lee-Yang-Parr's gradient-corrected correlation functional (B3LYP).<sup>18</sup> Singlet ground state geometry optimizations for **1**<sup>2+</sup> and **2**<sup>3+</sup> were carried out at the (R)B3LYP and (U)B3LYP levels, respectively, in the gas phase, using their respective crystallographic structures as starting points. All elements except Ru were assigned the 6-31G(d,f) basis set.<sup>19</sup> The double- $\zeta$  quality LANL2DZ ECP basis set<sup>20</sup> with an effective core potential and one additional f-type polarization was employed for the Ru atom. Vertical electronic excitations based on (R)B3LYP and (U)B3LYP-optimized geometries were computed for **1**<sup>2+</sup> and **2**<sup>3+</sup> using the TD-DFT formalism,<sup>21a,b</sup> respectively, in acetonitrile using conductor-like polarizable continuum model (CPCM).<sup>22a-c</sup> Vibrational frequency calculations were performed to ensure that the optimized geometries represent the local minima and there are only positive eigenvalues. The electronic distribution and localization of the singlet excited states were visualized using the electron density difference maps (ED-DMs).<sup>23</sup> Gausssum 2.2 and Chemission were employed to visualize the absorption spectra (simulated with Gaussian distribution with a full-width at half maximum (fwhm) set to 3000 cm<sup>-1</sup>) and to calculate the fractional contributions of various groups to each molecular orbital. All calculated structures and Kohn-Sham orbitals were visualized with ChemCraft.<sup>24</sup>

**Table S12.** Optimized Atomic coordinates obtained from DFT for  $1^{2+}$  in singlet ground state (rb3lyp/LanL2DZ(f)[Ru]6-31G\*\*[C,H,N]).

| Center Number | Atomic Number | Atomic Type | Coordinates (Angstroms) |           |           |
|---------------|---------------|-------------|-------------------------|-----------|-----------|
|               |               |             | X                       | Y         | Z         |
| 1             | 44            | 0           | -0.545664               | 0.000015  | 0.000029  |
| 2             | 7             | 0           | -0.125997               | -0.992801 | -1.835809 |
| 3             | 7             | 0           | 1.441919                | -0.000293 | 0.000095  |
| 4             | 7             | 0           | -0.125823               | 0.992635  | 1.835781  |
| 5             | 7             | 0           | -0.685039               | 1.879629  | -1.013404 |
| 6             | 7             | 0           | -1.557872               | 4.078253  | -1.035268 |
| 7             | 7             | 0           | -2.632296               | 2.381660  | 0.198591  |
| 8             | 7             | 0           | -2.658451               | 0.000291  | -0.000208 |
| 9             | 7             | 0           | -2.632879               | -2.381065 | -0.198906 |
| 10            | 7             | 0           | -1.559575               | -4.077736 | 1.035804  |
| 11            | 7             | 0           | -0.685736               | -1.879521 | 1.013545  |
| 12            | 6             | 0           | 1.215531                | -1.205606 | -2.029274 |
| 13            | 6             | 0           | 1.683070                | -1.874469 | -3.164219 |
| 14            | 1             | 0           | 2.745061                | -2.044867 | -3.295426 |
| 15            | 6             | 0           | 0.783095                | -2.310952 | -4.132485 |
| 16            | 1             | 0           | 1.137914                | -2.829022 | -5.017247 |
| 17            | 6             | 0           | -0.575421               | -2.054084 | -3.949415 |
| 18            | 1             | 0           | -1.311835               | -2.352853 | -4.687259 |
| 19            | 6             | 0           | -0.981762               | -1.397838 | -2.791368 |
| 20            | 1             | 0           | -2.026384               | -1.177505 | -2.609378 |
| 21            | 6             | 0           | 2.107587                | -0.628445 | -1.001251 |
| 22            | 6             | 0           | 3.500601                | -0.648214 | -1.013787 |
| 23            | 1             | 0           | 4.033544                | -1.176265 | -1.794746 |
| 24            | 6             | 0           | 4.232029                | -0.000458 | 0.000019  |
| 25            | 6             | 0           | 3.500739                | 0.647372  | 1.013878  |
| 26            | 1             | 0           | 4.033778                | 1.175389  | 1.794796  |
| 27            | 6             | 0           | 2.107723                | 0.627761  | 1.001416  |
| 28            | 6             | 0           | 1.215752                | 1.205071  | 2.029420  |
| 29            | 6             | 0           | 1.683342                | 1.873669  | 3.164492  |
| 30            | 1             | 0           | 2.745375                | 2.043705  | 3.295850  |
| 31            | 6             | 0           | 0.783382                | 2.310310  | 4.132703  |
| 32            | 1             | 0           | 1.138248                | 2.828196  | 5.017553  |
| 33            | 6             | 0           | -0.575185               | 2.053844  | 3.949446  |
| 34            | 1             | 0           | -1.311602               | 2.352737  | 4.687237  |
| 35            | 6             | 0           | -0.981583               | 1.397818  | 2.791295  |
| 36            | 1             | 0           | -2.026237               | 1.177782  | 2.609166  |
| 37            | 6             | 0           | 5.710344                | -0.000517 | -0.000054 |
| 38            | 6             | 0           | 6.427415                | 0.049301  | -1.209224 |
| 39            | 1             | 0           | 5.896264                | 0.124435  | -2.153750 |
| 40            | 6             | 0           | 7.820229                | 0.052787  | -1.207627 |
| 41            | 1             | 0           | 8.359749                | 0.105880  | -2.147907 |
| 42            | 6             | 0           | 8.520394                | -0.000641 | -0.000197 |
| 43            | 1             | 0           | 9.605732                | -0.000690 | -0.000255 |
| 44            | 6             | 0           | 7.820349                | -0.054003 | 1.207305  |



|    |   |   |           |           |           |
|----|---|---|-----------|-----------|-----------|
| 45 | 1 | 0 | 8.359957  | -0.107143 | 2.147531  |
| 46 | 6 | 0 | 6.427534  | -0.050395 | 1.209041  |
| 47 | 1 | 0 | 5.896471  | -0.125471 | 2.153621  |
| 48 | 6 | 0 | -3.348245 | 1.170337  | 0.050467  |
| 49 | 6 | 0 | -4.747245 | 1.198068  | 0.013790  |
| 50 | 1 | 0 | -5.279232 | 2.138914  | -0.009551 |
| 51 | 6 | 0 | -5.449020 | 0.000742  | -0.001062 |
| 52 | 1 | 0 | -6.534046 | 0.000896  | -0.001430 |
| 53 | 6 | 0 | -4.747612 | -1.196815 | -0.015457 |
| 54 | 1 | 0 | -5.279963 | -2.137458 | 0.007572  |
| 55 | 6 | 0 | -3.348583 | -1.169566 | -0.051243 |
| 56 | 6 | 0 | -3.271660 | -3.476228 | -0.959430 |
| 57 | 1 | 0 | -2.518399 | -3.898114 | -1.636251 |
| 58 | 1 | 0 | -4.058349 | -3.050662 | -1.581165 |
| 59 | 6 | 0 | -3.784006 | -4.545603 | -0.004833 |
| 60 | 1 | 0 | -4.512594 | -4.112064 | 0.687692  |
| 61 | 1 | 0 | -4.283864 | -5.355724 | -0.543260 |
| 62 | 6 | 0 | -2.583733 | -5.099862 | 0.752223  |
| 63 | 1 | 0 | -2.893187 | -5.553467 | 1.700507  |
| 64 | 1 | 0 | -2.102096 | -5.888222 | 0.159208  |
| 65 | 6 | 0 | -0.391239 | -4.570924 | 1.779657  |
| 66 | 1 | 0 | 0.423413  | -4.814073 | 1.083522  |
| 67 | 1 | 0 | -0.683072 | -5.496891 | 2.279690  |
| 68 | 6 | 0 | 0.040204  | -3.511660 | 2.781920  |
| 69 | 1 | 0 | -0.760307 | -3.359666 | 3.514395  |
| 70 | 1 | 0 | 0.930867  | -3.833960 | 3.328886  |
| 71 | 6 | 0 | 0.331589  | -2.222815 | 2.021853  |
| 72 | 1 | 0 | 0.414511  | -1.386817 | 2.720554  |
| 73 | 1 | 0 | 1.299327  | -2.306988 | 1.512104  |
| 74 | 6 | 0 | -1.584556 | -2.765697 | 0.660654  |
| 75 | 6 | 0 | -3.271059 | 3.476777  | 0.959209  |
| 76 | 1 | 0 | -2.518006 | 3.898102  | 1.636619  |
| 77 | 1 | 0 | -4.058266 | 3.051268  | 1.580322  |
| 78 | 6 | 0 | -3.782431 | 4.546739  | 0.004756  |
| 79 | 1 | 0 | -4.282251 | 5.356848  | 0.543233  |
| 80 | 1 | 0 | -4.510812 | 4.113789  | -0.688361 |
| 81 | 6 | 0 | -2.581520 | 5.100802  | -0.751417 |
| 82 | 1 | 0 | -2.890331 | 5.555206  | -1.699527 |
| 83 | 1 | 0 | -2.099683 | 5.888518  | -0.157691 |
| 84 | 6 | 0 | -0.389181 | 4.571063  | -1.778811 |
| 85 | 1 | 0 | 0.425486  | 4.813658  | -1.082502 |
| 86 | 1 | 0 | -0.680501 | 5.497293  | -2.278662 |
| 87 | 6 | 0 | 0.041902  | 3.511833  | -2.781274 |
| 88 | 1 | 0 | -0.758605 | 3.360364  | -3.513858 |
| 89 | 1 | 0 | 0.932764  | 3.833862  | -3.328076 |
| 90 | 6 | 0 | 0.332619  | 2.222704  | -2.021441 |
| 91 | 1 | 0 | 0.415327  | 1.386798  | -2.720289 |
| 92 | 1 | 0 | 1.300305  | 2.306385  | -1.511509 |
| 93 | 6 | 0 | -1.583561 | 2.766106  | -0.660472 |

---

**Table S13.** Optimized Atomic coordinates obtained from DFT for  $2^{3+}$  in ground state (ub3lyp/LanL2DZ(f)[Ru]6-31G\*\*[C,H,N]).

| Center Number | Atomic Number | Atomic Type | Coordinates (Angstroms) |           |           |
|---------------|---------------|-------------|-------------------------|-----------|-----------|
|               |               |             | X                       | Y         | Z         |
| 1             | 44            | 0           | -0.002715               | 0.399660  | -0.013711 |
| 2             | 7             | 0           | -1.165717               | -0.946667 | 1.036428  |
| 3             | 7             | 0           | -3.082467               | 0.407767  | 0.752916  |
| 4             | 7             | 0           | -3.289103               | 2.537075  | 1.656897  |
| 5             | 7             | 0           | -1.185491               | 1.791633  | 0.923749  |
| 6             | 7             | 0           | 0.796241                | -2.046974 | 1.675821  |
| 7             | 7             | 0           | 2.195813                | -1.132409 | 3.279170  |
| 8             | 7             | 0           | 1.263223                | 0.262285  | 1.615081  |
| 9             | 7             | 0           | 1.153897                | -0.974733 | -1.026198 |
| 10            | 7             | 0           | -0.815465               | -2.093801 | -1.621427 |
| 11            | 7             | 0           | -2.276328               | -1.245576 | -3.216340 |
| 12            | 7             | 0           | -1.267483               | 0.211105  | -1.646255 |
| 13            | 7             | 0           | 3.070494                | 0.361534  | -0.730656 |
| 14            | 7             | 0           | 3.340513                | 2.458310  | -1.710168 |
| 15            | 7             | 0           | 1.203213                | 1.753173  | -1.015055 |
| 16            | 6             | 0           | -2.516779               | -0.839736 | 1.061246  |
| 17            | 6             | 0           | -3.316456               | -1.939703 | 1.361833  |
| 18            | 1             | 0           | -4.264419               | -1.867831 | 1.355937  |
| 19            | 6             | 0           | -2.701879               | -3.141409 | 1.667354  |
| 20            | 1             | 0           | -3.229716               | -3.921205 | 1.800350  |
| 21            | 6             | 0           | -1.327468               | -3.216602 | 1.780275  |
| 22            | 1             | 0           | -0.901398               | -4.026477 | 2.037635  |
| 23            | 6             | 0           | -0.588628               | -2.075913 | 1.505784  |
| 24            | 6             | 0           | 1.524776                | -3.305370 | 1.904047  |
| 25            | 1             | 0           | 2.424070                | -3.249982 | 1.494837  |
| 26            | 1             | 0           | 1.037064                | -4.055978 | 1.478595  |
| 27            | 6             | 0           | 1.656483                | -3.561228 | 3.398871  |
| 28            | 1             | 0           | 0.767064                | -3.762067 | 3.784968  |
| 29            | 1             | 0           | 2.247748                | -4.340574 | 3.556216  |
| 30            | 6             | 0           | 2.215613                | -2.378151 | 4.040125  |
| 31            | 1             | 0           | 3.156566                | -2.576442 | 4.277198  |
| 32            | 1             | 0           | 1.724240                | -2.228530 | 4.886123  |
| 33            | 6             | 0           | 3.044080                | -0.083264 | 3.849462  |
| 34            | 1             | 0           | 3.898192                | -0.474942 | 4.160925  |
| 35            | 1             | 0           | 2.590236                | 0.329362  | 4.626629  |
| 36            | 6             | 0           | 3.315998                | 0.969188  | 2.793226  |
| 37            | 1             | 0           | 3.893958                | 0.596321  | 2.080421  |
| 38            | 1             | 0           | 3.777293                | 1.746145  | 3.196033  |
| 39            | 6             | 0           | 1.977787                | 1.396277  | 2.212356  |
| 40            | 1             | 0           | 1.421333                | 1.794211  | 2.927535  |
| 41            | 1             | 0           | 2.126525                | 2.090804  | 1.521756  |
| 42            | 6             | 0           | 1.423934                | -0.904340 | 2.206707  |
| 43            | 6             | 0           | -4.547032               | 0.490401  | 0.624124  |
| 44            | 1             | 0           | -4.914279               | -0.382783 | 0.334854  |
| 45            | 1             | 0           | -4.792851               | 1.173291  | -0.049778 |
| 46            | 6             | 0           | -5.107487               | 0.871754  | 1.985420  |
| 47            | 1             | 0           | -4.789041               | 0.242874  | 2.680633  |

|     |   |   |           |           |           |
|-----|---|---|-----------|-----------|-----------|
| 48  | 1 | 0 | -6.097954 | 0.852975  | 1.971540  |
| 49  | 6 | 0 | -4.600932 | 2.280609  | 2.260501  |
| 50  | 1 | 0 | -5.253102 | 2.933702  | 1.904878  |
| 51  | 1 | 0 | -4.537787 | 2.417516  | 3.239671  |
| 52  | 6 | 0 | -2.887439 | 3.946965  | 1.807329  |
| 53  | 1 | 0 | -2.790902 | 4.163369  | 2.767894  |
| 54  | 1 | 0 | -3.588480 | 4.533355  | 1.427234  |
| 55  | 6 | 0 | -1.587827 | 4.196080  | 1.104187  |
| 56  | 1 | 0 | -1.199763 | 5.059268  | 1.400576  |
| 57  | 1 | 0 | -1.732120 | 4.237630  | 0.125379  |
| 58  | 6 | 0 | -0.640683 | 3.050758  | 1.445224  |
| 59  | 1 | 0 | 0.248271  | 3.221592  | 1.046055  |
| 60  | 1 | 0 | -0.532396 | 2.987725  | 2.427683  |
| 61  | 6 | 0 | -2.472199 | 1.604164  | 1.146744  |
| 62  | 6 | 0 | 2.511618  | -0.883604 | -1.025443 |
| 63  | 6 | 0 | 3.301219  | -1.987160 | -1.289542 |
| 64  | 1 | 0 | 4.249684  | -1.920889 | -1.265425 |
| 65  | 6 | 0 | 2.694820  | -3.181678 | -1.585813 |
| 66  | 1 | 0 | 3.223883  | -3.962722 | -1.696489 |
| 67  | 6 | 0 | 1.320976  | -3.260216 | -1.725680 |
| 68  | 1 | 0 | 0.900355  | -4.069021 | -1.986946 |
| 69  | 6 | 0 | 0.579040  | -2.114429 | -1.469318 |
| 70  | 6 | 0 | -1.500820 | -3.386315 | -1.853270 |
| 71  | 1 | 0 | -2.422367 | -3.352244 | -1.491903 |
| 72  | 1 | 0 | -1.012821 | -4.115695 | -1.394616 |
| 73  | 6 | 0 | -1.537823 | -3.643851 | -3.345046 |
| 74  | 1 | 0 | -1.966092 | -4.517194 | -3.533862 |
| 75  | 1 | 0 | -0.619036 | -3.657579 | -3.713578 |
| 76  | 6 | 0 | -2.345825 | -2.508958 | -3.972492 |
| 77  | 1 | 0 | -2.012563 | -2.349457 | -4.891269 |
| 78  | 1 | 0 | -3.292554 | -2.788594 | -4.038583 |
| 79  | 6 | 0 | -3.147589 | -0.204924 | -3.784509 |
| 80  | 1 | 0 | -4.020212 | -0.602929 | -4.032619 |
| 81  | 1 | 0 | -2.732654 | 0.162765  | -4.604386 |
| 82  | 6 | 0 | -3.363629 | 0.898087  | -2.792837 |
| 83  | 1 | 0 | -3.932721 | 0.578885  | -2.048945 |
| 84  | 1 | 0 | -3.817822 | 1.661615  | -3.229683 |
| 85  | 6 | 0 | -2.003079 | 1.336148  | -2.258490 |
| 86  | 1 | 0 | -1.467002 | 1.712771  | -3.000805 |
| 87  | 1 | 0 | -2.131348 | 2.048102  | -1.583691 |
| 88  | 6 | 0 | -1.468029 | -0.979148 | -2.180709 |
| 89  | 6 | 0 | 4.535934  | 0.451683  | -0.535131 |
| 90  | 1 | 0 | 4.886105  | -0.409380 | -0.190113 |
| 91  | 1 | 0 | 4.747233  | 1.161766  | 0.122062  |
| 92  | 6 | 0 | 5.172698  | 0.773138  | -1.871302 |
| 93  | 1 | 0 | 4.893993  | 0.113872  | -2.554450 |
| 94  | 1 | 0 | 6.159466  | 0.756284  | -1.797309 |
| 95  | 6 | 0 | 4.692533  | 2.161621  | -2.247531 |
| 96  | 1 | 0 | 5.332862  | 2.832925  | -1.901601 |
| 97  | 1 | 0 | 4.673129  | 2.240418  | -3.235302 |
| 98  | 6 | 0 | 2.951583  | 3.844781  | -1.954897 |
| 99  | 1 | 0 | 2.904109  | 4.006091  | -2.930414 |
| 100 | 1 | 0 | 3.638186  | 4.451727  | -1.576796 |
| 101 | 6 | 0 | 1.613615  | 4.150265  | -1.328231 |

|     |   |   |           |          |           |
|-----|---|---|-----------|----------|-----------|
| 102 | 1 | 0 | 1.242465  | 4.984657 | -1.708109 |
| 103 | 1 | 0 | 1.715327  | 4.269646 | -0.350380 |
| 104 | 6 | 0 | 0.683750  | 2.990582 | -1.616799 |
| 105 | 1 | 0 | -0.214191 | 3.185233 | -1.249838 |
| 106 | 1 | 0 | 0.596465  | 2.871061 | -2.596302 |
| 107 | 6 | 0 | 2.498457  | 1.555243 | -1.183595 |

---

## References:

1. (a) C. A. Parker, W. T. Rees, *Analyst*, 1960, **85**, 587, (b) G. A. Crosby, J. N. Demas, *J. Phys. Chem.*, 1971, **75**, 991.
2. C. Würth, M. Grabolle, J. Pauli, M. Spieles, U. Resch-Genger, *Nat. Protocol*, 2013, **8**, 1535.
3. J. Wang, G. S. Hanan, *Synlett*, 2005, **8**, 1251.
4. Y. Sun, M. L. Machala, F. N. Castellano, *Inorg. Chim. Acta*, 2010, **363**, 283.
5. M.-P. Santoni, A. K. Pal, G. S. Hanan, A. Proust, B. Hasenknopf, *Inorg. Chem. Commun.*, 2011, **14**, 399.
6. *APEX2 (2007) version 2.4-0; Bruker Molecular Analysis Research Tool*. Bruker AXS Inc., Madison, WI 53719-1173.
7. G. M. Sheldrick (1996). *SADABS*, Bruker Area Detector Absorption Corrections. Bruker AXS Inc., Madison, WI 53719-1173.
8. *SHELXTL (2001) version 6.12*; Bruker Analytical X-ray Systems Inc., Madison, WI 53719-1173.
9. A. L. Spek, (2008). *PLATON*, A Multipurpose Crystallographic Tool, Utrecht University, Utrecht, The Netherlands.
10. E. C. Constable, C. E. Housecroft, E. A. Medlycott, M. Neuburger, F. Reinders, S. Reymann, S. Schaffner, *Inorg. Chem. Commun.*, 2008, **11**, 805.
11. M. Jäger, R. J. Kumar, H. Görls, J. Bergquist, O. Johansson, *Inorg. Chem.*, 2009, **48**, 3228.

12. A. Harriman, A. Mayeux, A. D. Nicola, R. Ziessel, *Phys. Chem. Chem. Phys.*, 2002, **4**, 2229.
13. M. Maestri, N. Armaroli, V. Balzani, E. C. Constable, A. M. W. C. Thompson, *Inorg. Chem.*, 1995, **34**, 2759.
14. S. H. Wadman, M. Lutz, D. M. Tooke, A. L. Spek, F. Hart, R. W. A. Havenith, G. P. M. van Klink, G. van Koten, *Inorg. Chem.*, 2009, **48**, 1887.
15. U. Siemeling, J. V. der Bruggen, U. Vorfeld, B. Neumann, A. Stammler, H.-G. Stammler, A. Brockhinke, R. Plessow, P. Zanello, F. Laschi, F. F. de Biani, M. Fontani, S. Steenken, M. Stapper, G. Gurzadyan, *Chem. Eur. J.*, 2003, **9**, 2819.
16. M. J. Frisch, G. W. Trucks, H. B. Schlegel, G. E. Scuseria, M. A. Robb, J. R. Cheeseman, J. A. Montgomery, T. J. Vreven, K. N. Kudin, J. C. Burant, J. M. S. Millam, J. Tomasi, V. Barone, B. Mennucci, M. Cossi, G. Scalmani, N. Rega, G. A. Petersson, H. Nakatsuji, M. Hada, M. Ehara, K. Toyota, R. Fukuda, J. Hasegawa, M. Ishida, T. Nakajima, Y. Honda, O. Kitao, H. Nakai, M. Klene, X. Li, J. E. Knox, H. P. Hratchian, J. B. Cross, C. Adamo, J. Jaramillo, R. Gomperts, R. E. Startmann, O. Yazyev, A. J. Austin, R. Cammi, C. Pomelli, J. W. Ochterski, P. Y. Ayala, K. Morokuma, G. A. Voth, P. Salvador, J. J. Dannenberg, V. G. Zakrzewski, J. M. Dapprich, A. D. Daniels, M. C. Strain, O. Farkas, D. K. Malick, A. D. Rabuck, K. Raghavachari, J. B. Foresman, J. V. Ortiz, Q. Cui, A. G. Baboul, S. Clifford, J. B. Cioslowski, G. Liu, A. Liashenko, I. Piskorz, L. M. R. Komaromi, D. J. Fox, T. Keith, M. A. Al-Laham, C. Y. Peng, A. Manayakkara, M. Challacombe, P. M. W. Gill, B. G. Johnson, W. Chen, M. W. Wong, C. Gonzalez, J. A. Pople, *Gaussian 2003, Revision C.02; Gaussian Inc.:Pittsburgh PA, 2003*.
17. A. D. Becke, *J. Chem. Phys.*, 1993, **98**, 5648.

18. C. Lee, W. Yang, R. G. Parr, *Phys. Rev. B: Condens. Matter*, 1988, **37**, 785.
19. A. D. McLean, G. S. Chandler, *J. Chem. Phys.*, 1980, **72**, 5639.
20. P. J. Hay, W. R. Wadt, *J. Chem. Phys.*, 1985, **82**, 270.
21. (a) M. E. Casida, C. Jamorski, K. C. Casida, D. R. Salahub, *J. Chem. Phys.*, 1998, **108**, 4439. (b) R. E. Stratmann, G. E. Scuseria, M. J. Frisch, *J. Chem. Phys.*, 1998, **109**, 8218.
22. (a) M. Cossi, N. Rega, G. Scalmani, V. Barone, *J. Comput. Chem.*, 2003, **24**, 669. (b) M. Cossi, V. Barone, *J. Chem. Phys.*, 2001, **115**, 4708. (c) V. Barone, M. Cossi, *J. Phys. Chem. A*, 1998, **102**, 1995.
23. W. R. Browne, N. M. O'Boyle, J. J. McGarvey, J. G. Vos, *Chem. Soc. Rev.*, 2005, **34**, 641.
24. D. A. Zhurko, G. A. Zhurko, *ChemCraft 1.5*; Plimus: San Diego, CA. Available at <http://www.chemcraftprog.com>.
